# Supplementary material for: Regulatory T cells are associated with the tumor immune microenvironment and immunotherapy response in triple-negative breast cancer
Source: PubMed Central journal article supplement (PMC10521732; doi:10.3389/fimmu.2023.1263537), 2023-09-12

敲減TK1

231

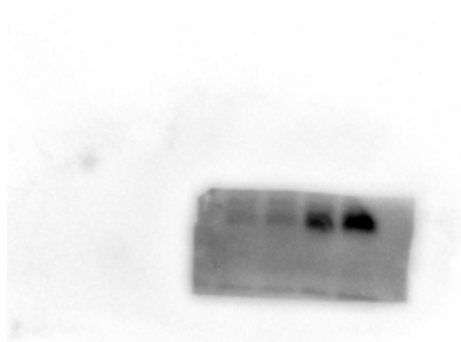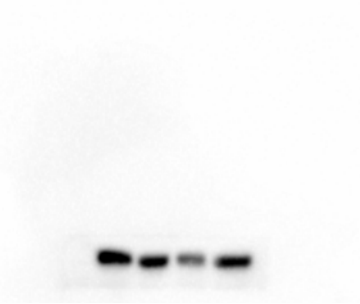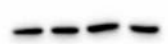

549

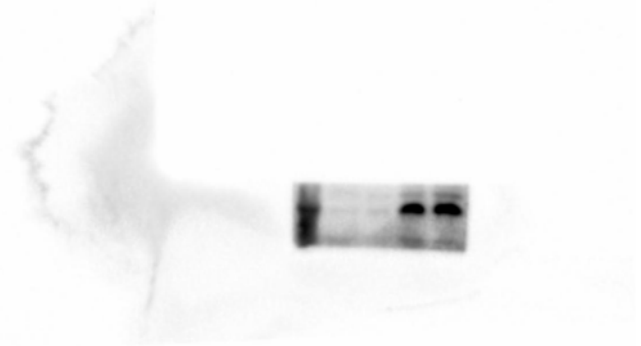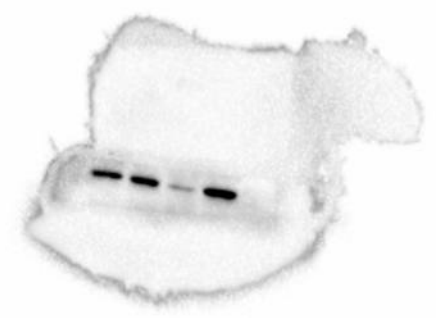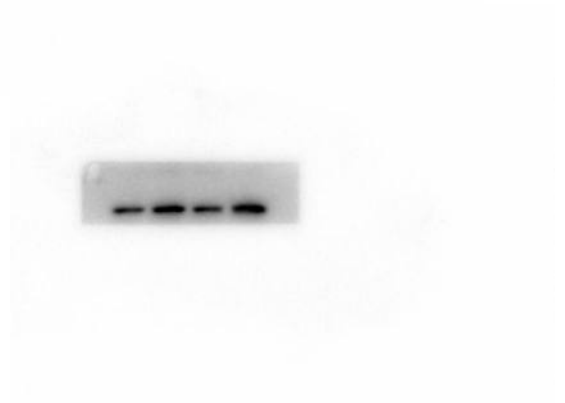

划痕 MDA-MB-231 0h

si-nc

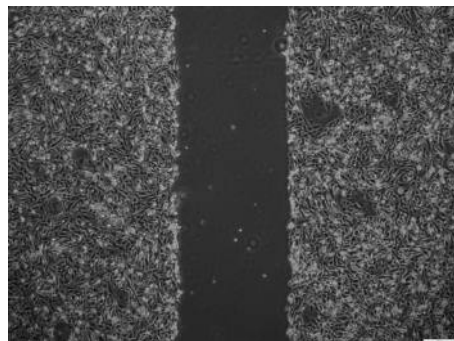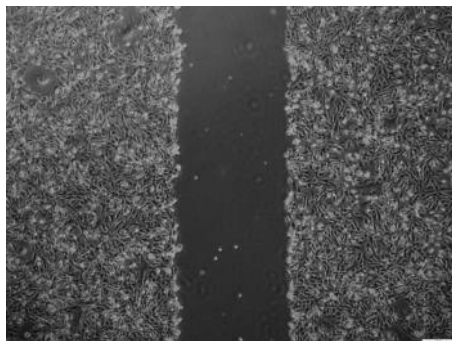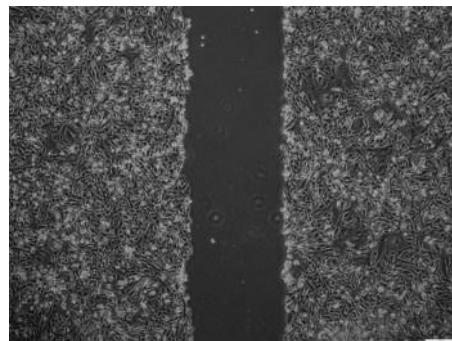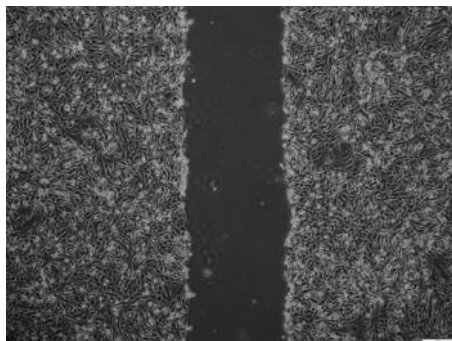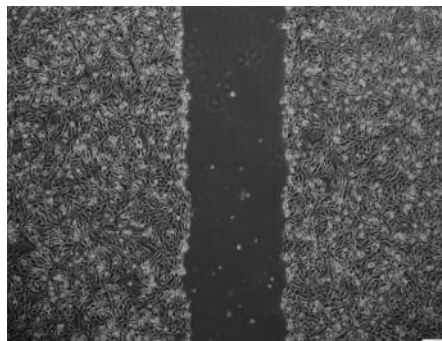

si-1

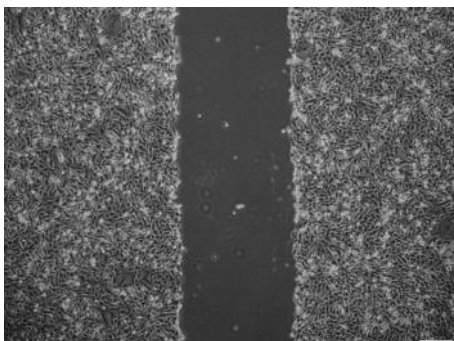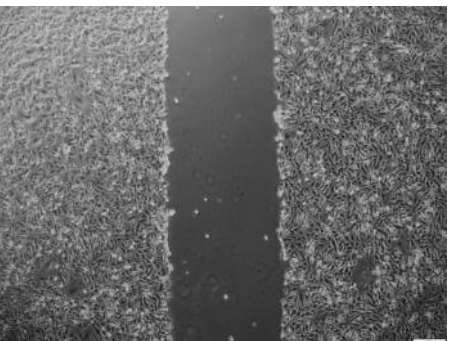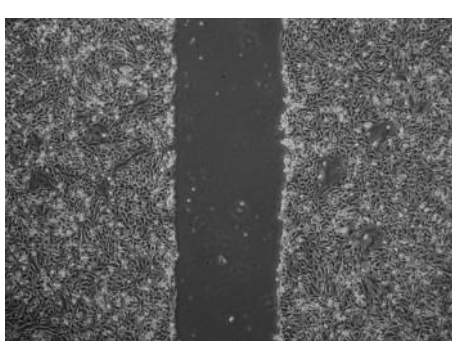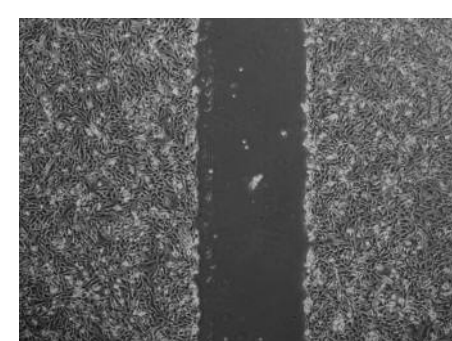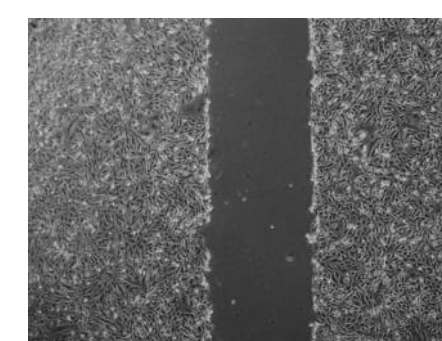

si-2

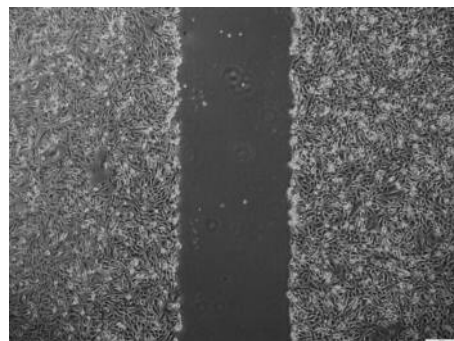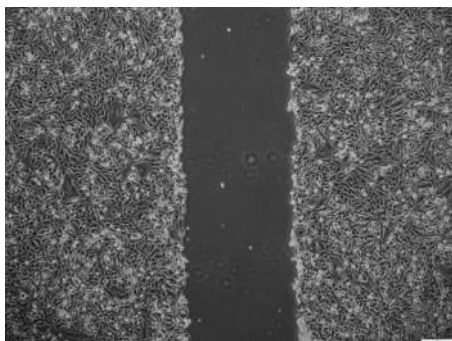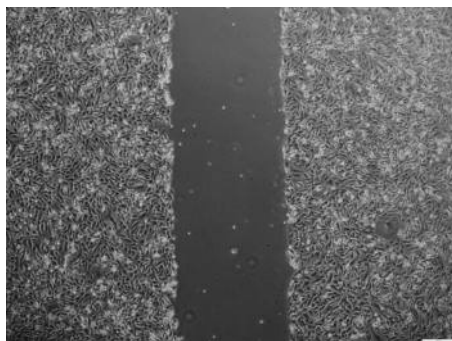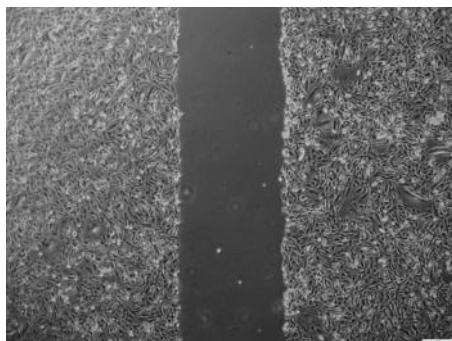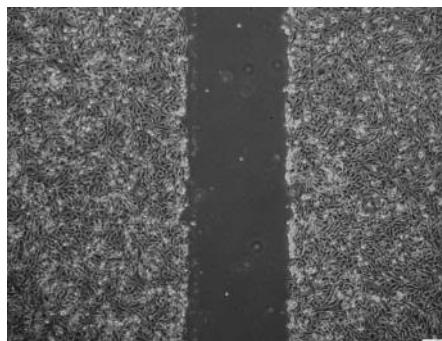

划痕 MDA-MB-231 24h

si-nc

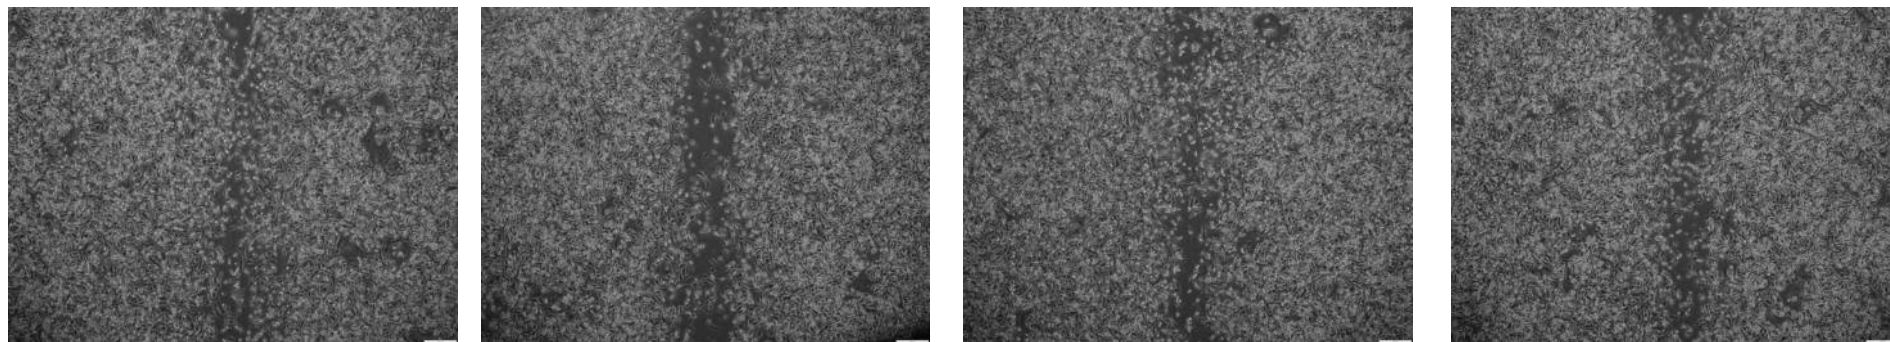

si-1

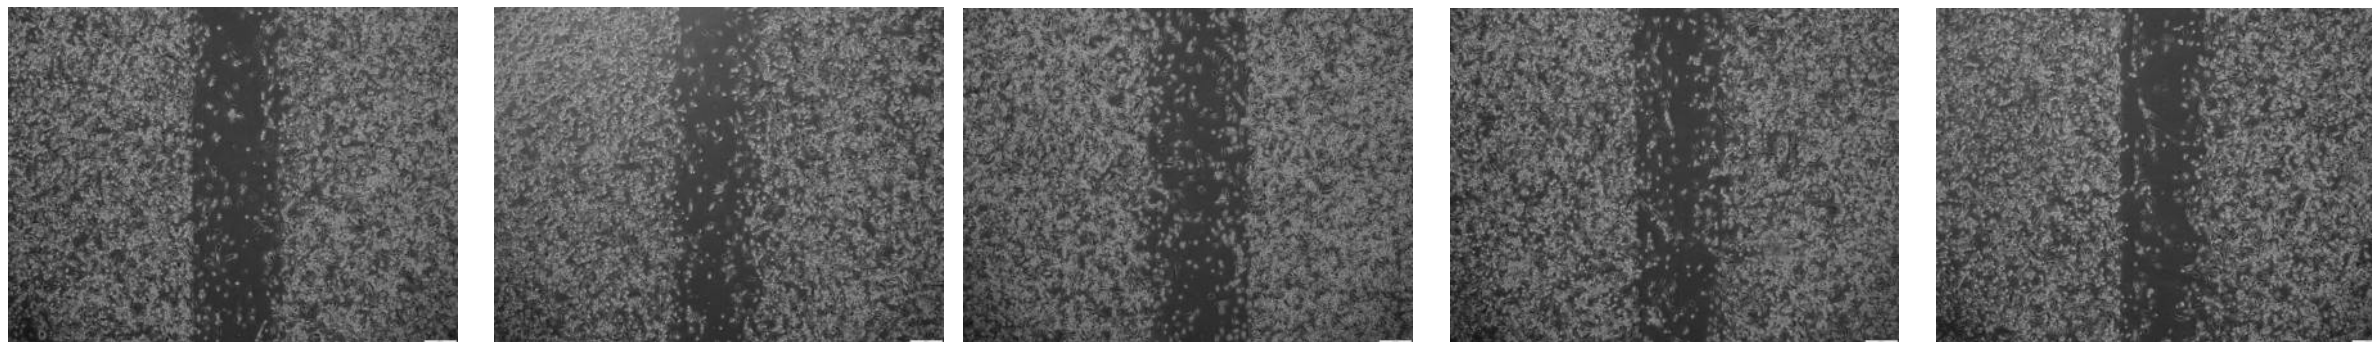

si-2

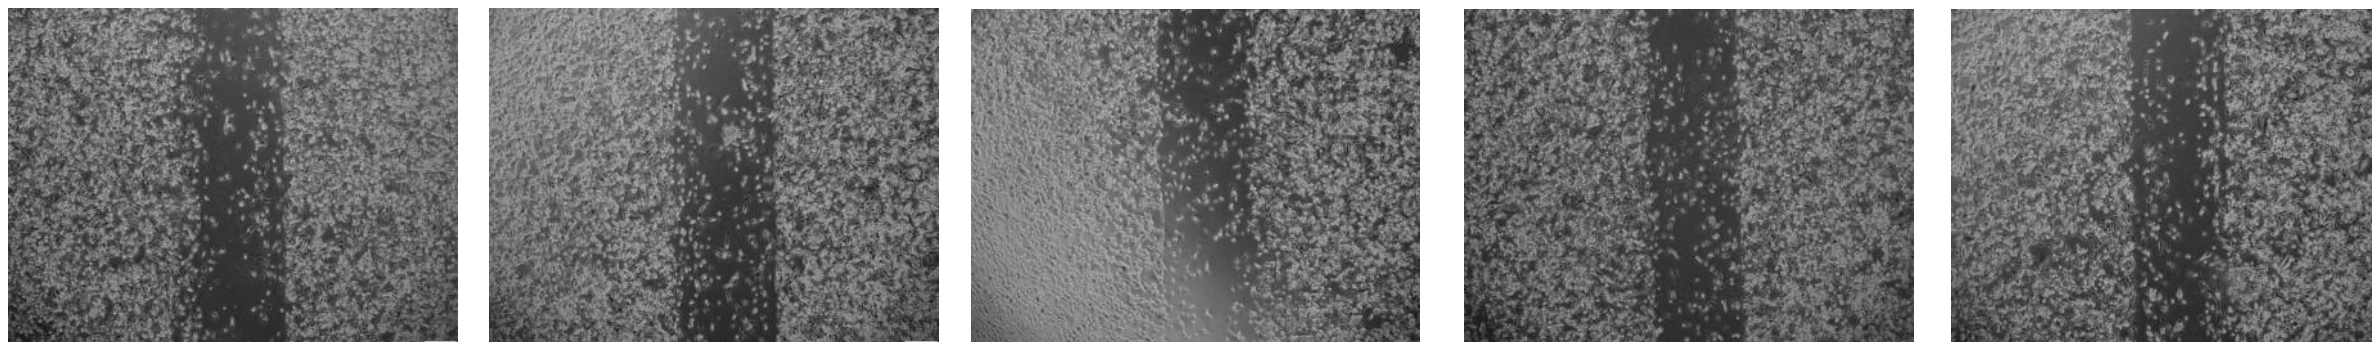



BT-549 0h

si-nc

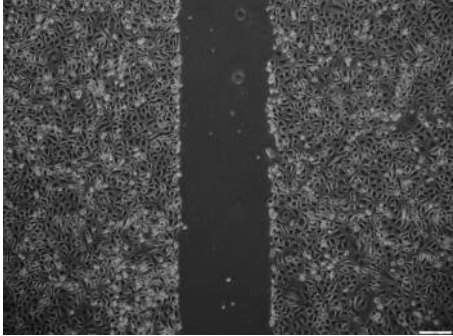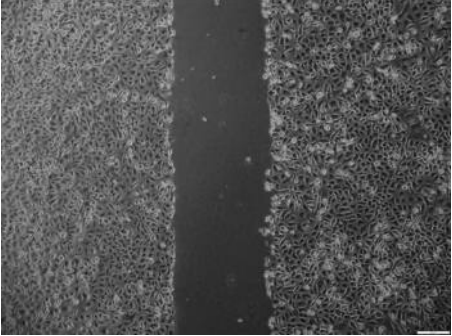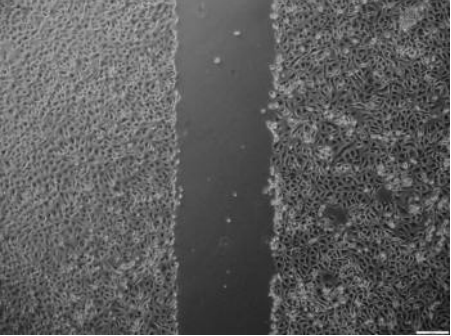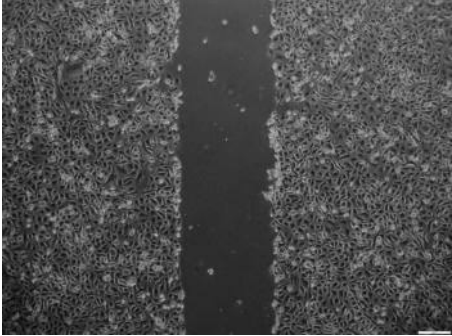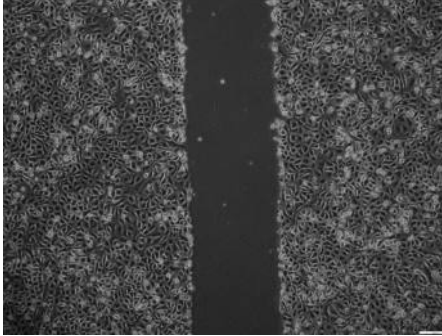

si-1

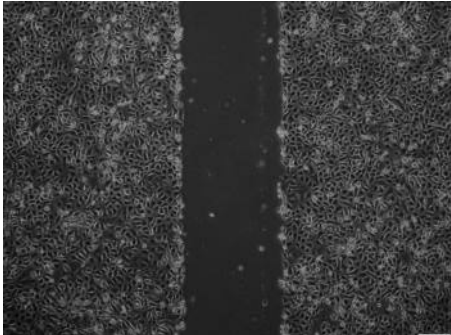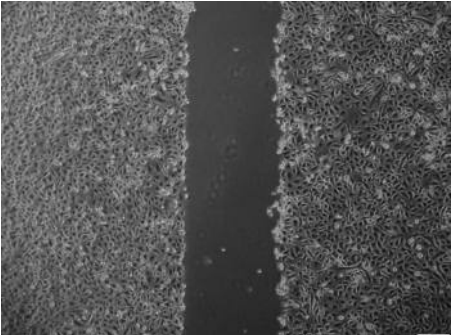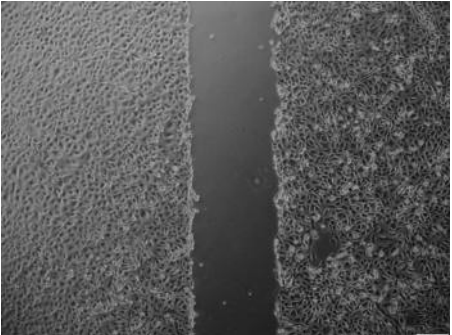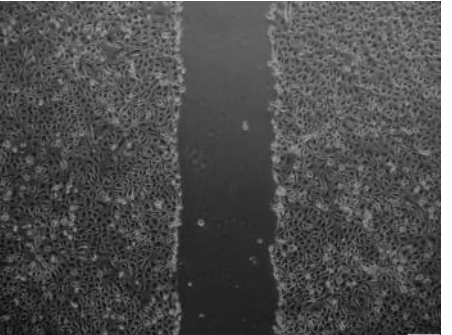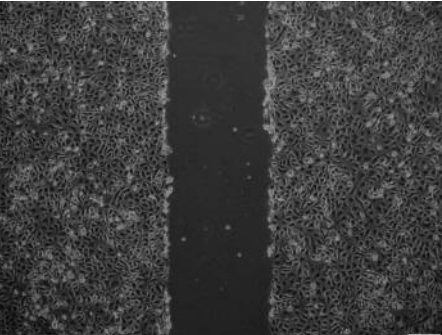

si-2

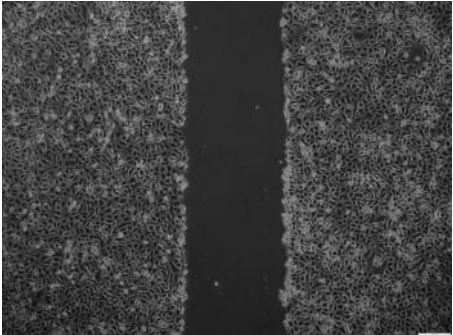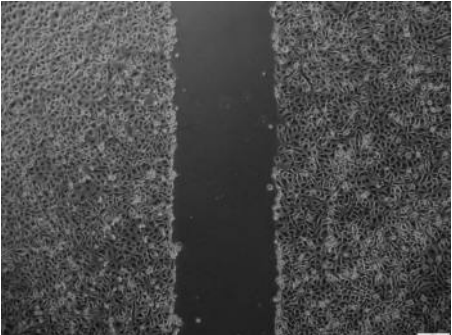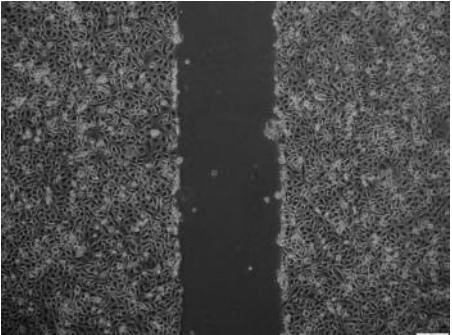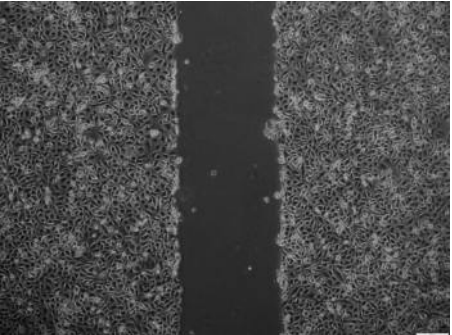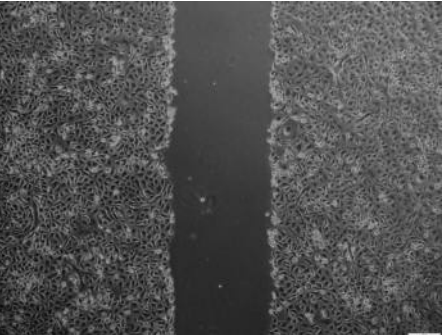





transwell MDA-MB-231

si-nc

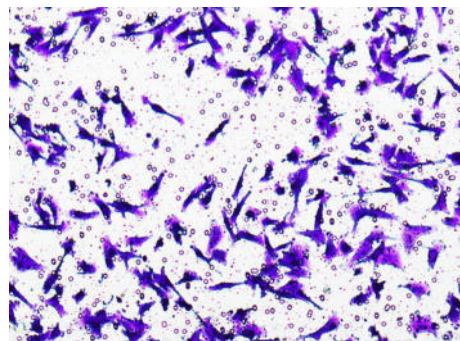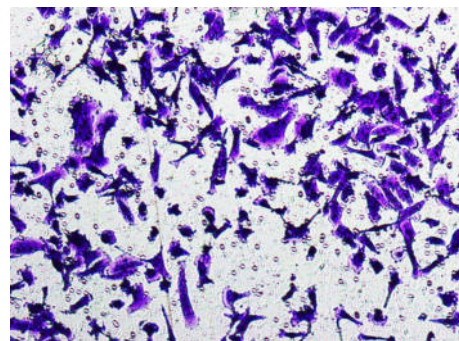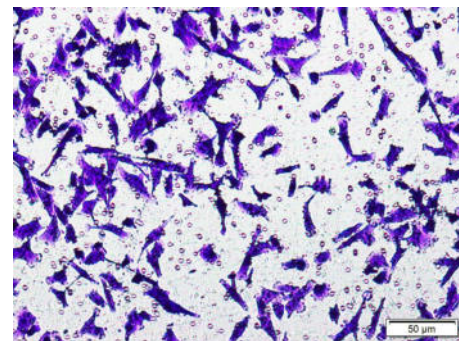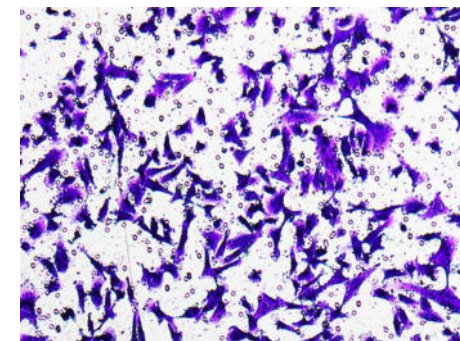

si-1

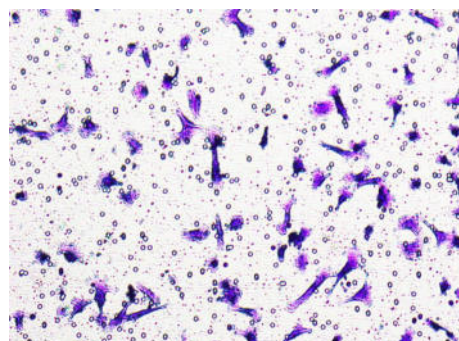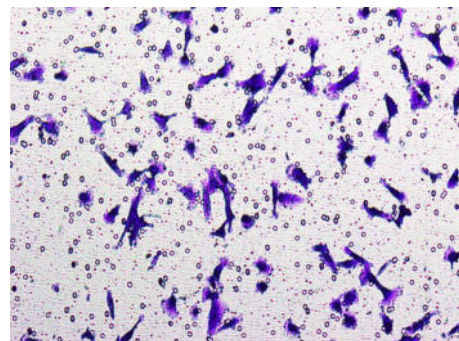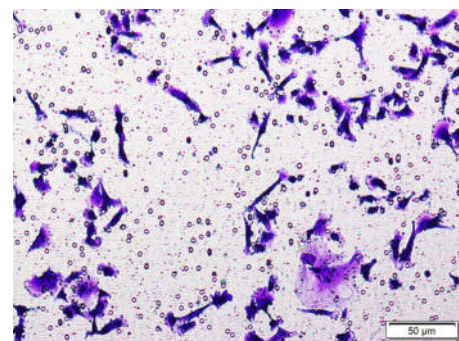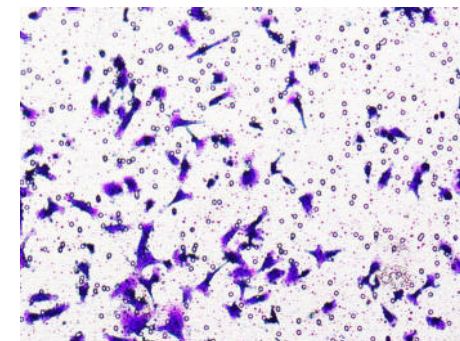

si-2

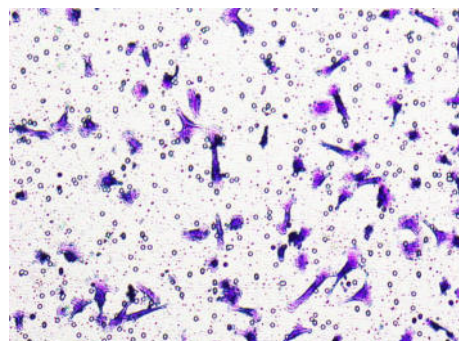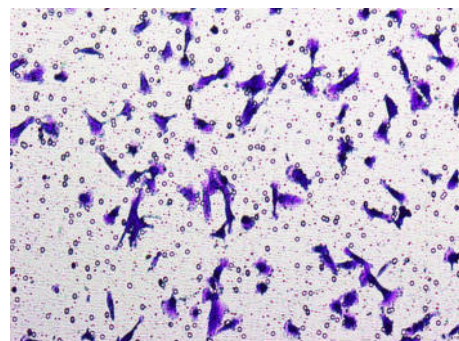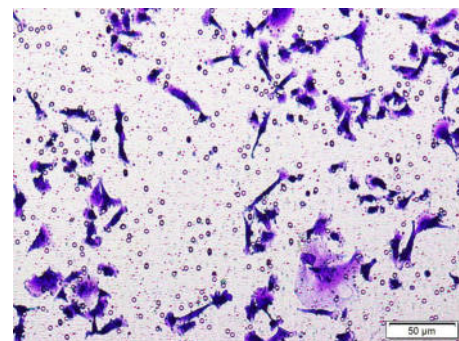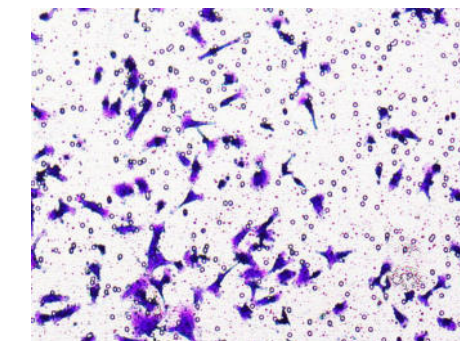



BT-549

si-nc

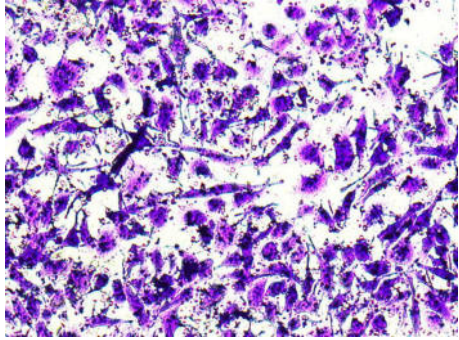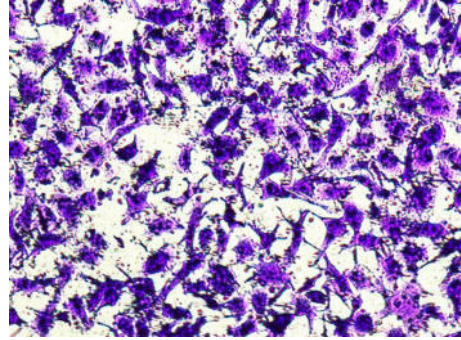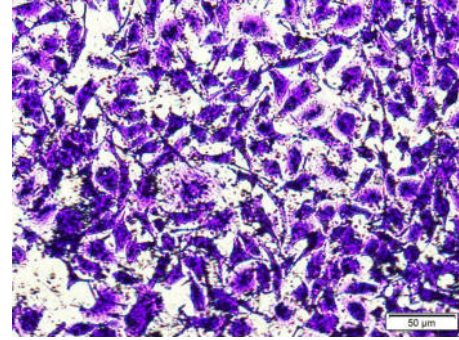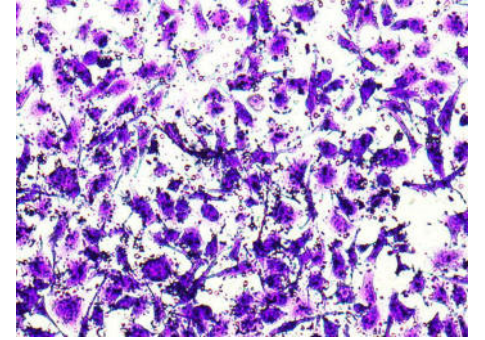

si-1

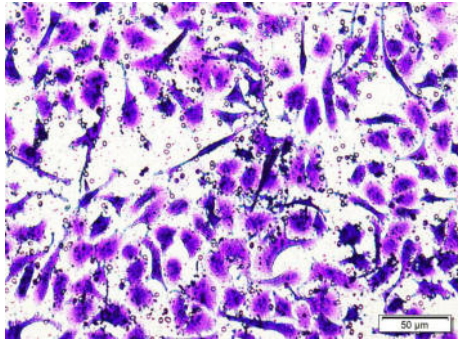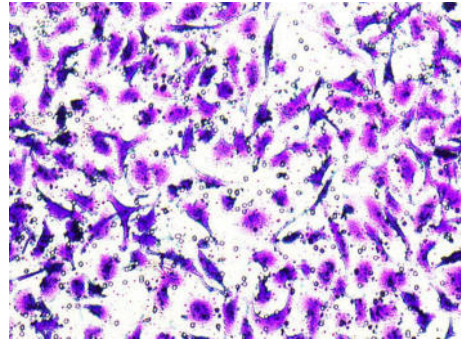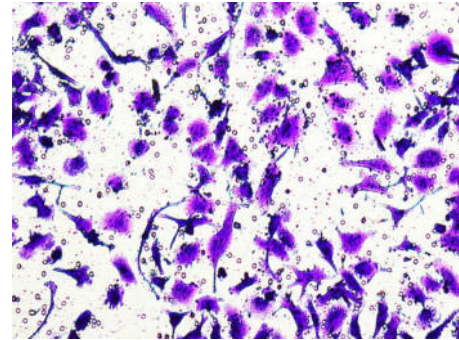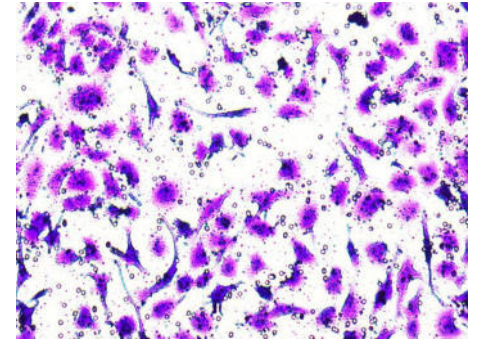

si-2

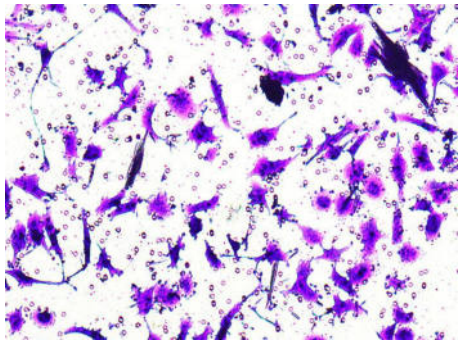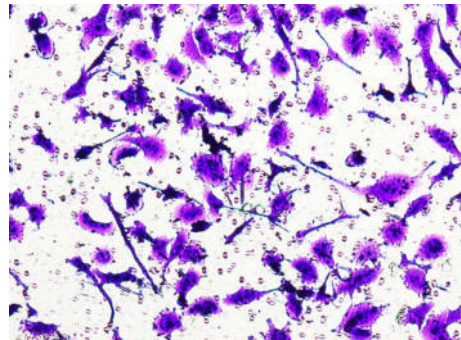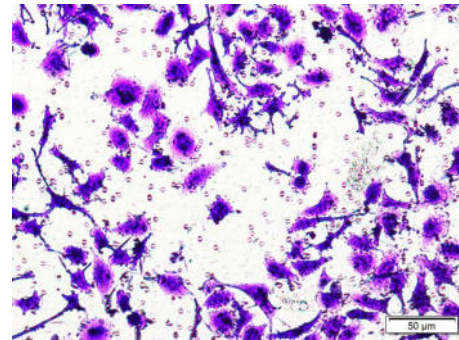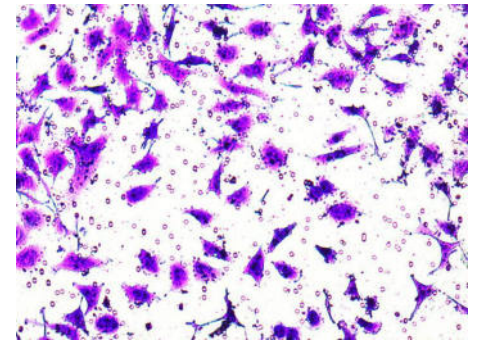



# 平板克隆

MDA-MB-231

BT-549

si-nc

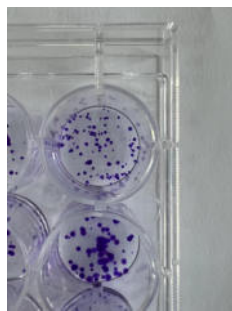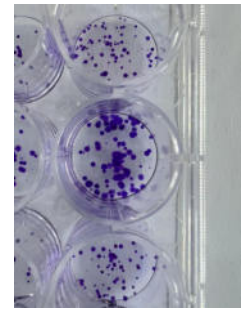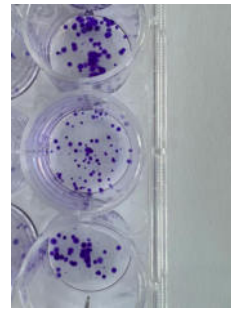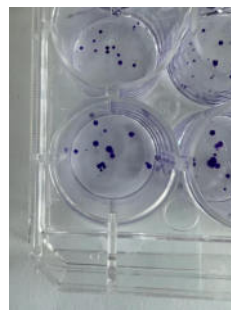

si-1

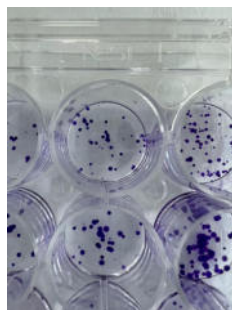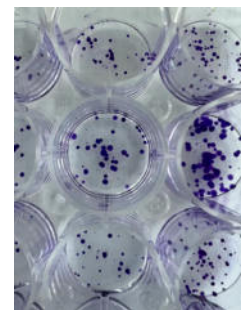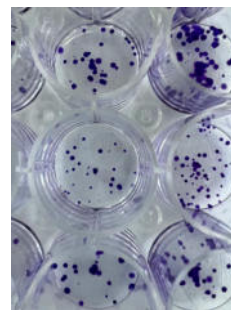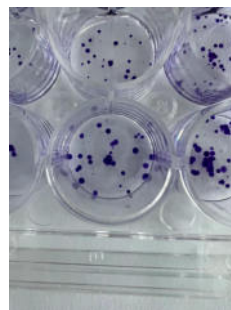

si-2

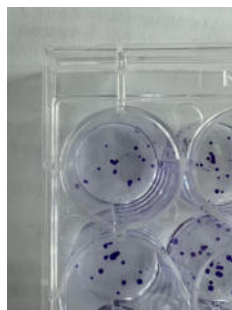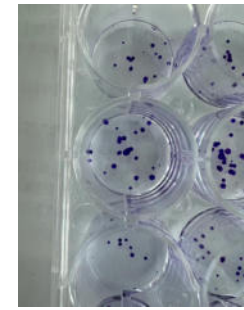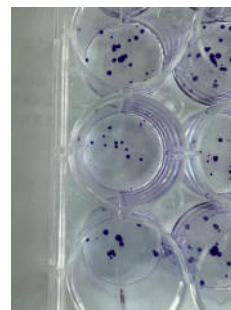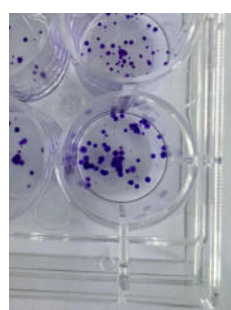

Supplement: DataSheet_2.pdf [file DataSheet_2.pdf]
